# Supplementary material for: Novel carbon quantum dots for fluorescent detection of phenol and insights into the mechanism
Source: Royal Society of Chemistry journal article supplement (doi:10.1039/c8nj01611a), 2018-01-01
Supplement: c8nj01611a1.pdf [file c8nj01611a1.pdf]

## Supplementary Data

### A novel carbon quantum dots for fluorescent detection of phenol and insight into the mechanism

Hong Xue, Yang Yan, Yong Hou, Guanglan Li, Ce Hao \*

State Key Laboratory of Fine Chemicals, Dalian University of Technology, Panjin  
campus 124221, China.

\*E-mail: haoce@dlut.edu.cn (CH). Tel. / Fax: +86-411-84986335

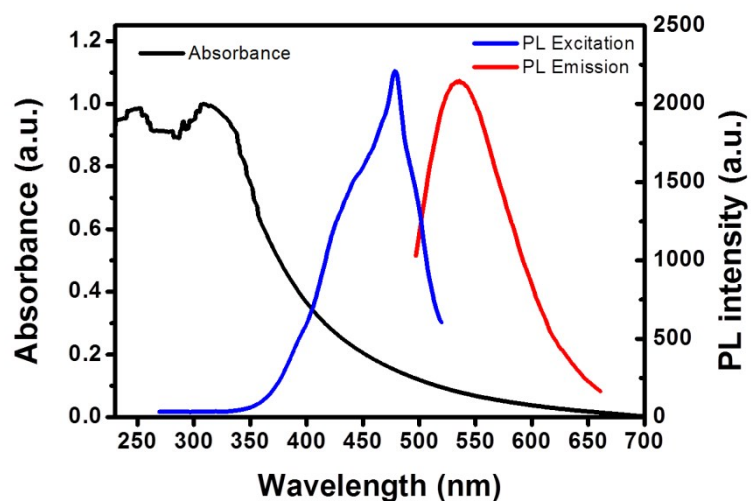

Fig. S1 UV-Vis absorption (Abs), PL excitation (Ex,  $\lambda_{em}=530$  nm) and PL emission (Em,  $\lambda_{ex}=470$  nm) of the CQDs (in water, pH = 7).

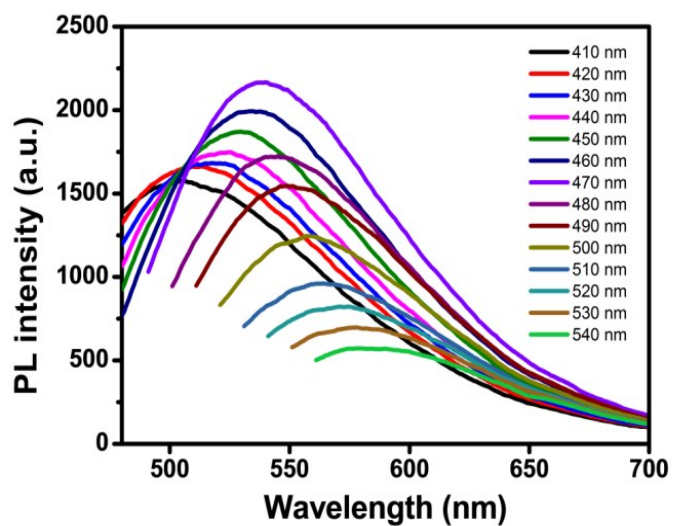

Fig. S2 The emission curves of CQDs with the different excitation wavelength from 410 nm to 540 nm (in water, pH = 7)

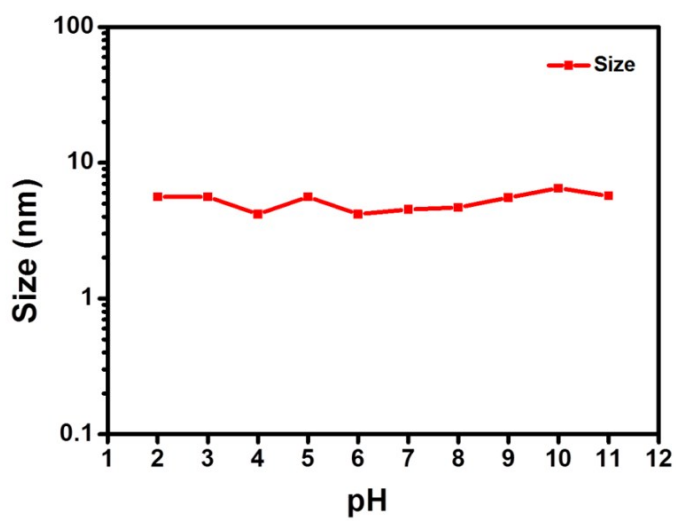

Fig. S3 The Size number of CQDs dispersed in different pH solutions

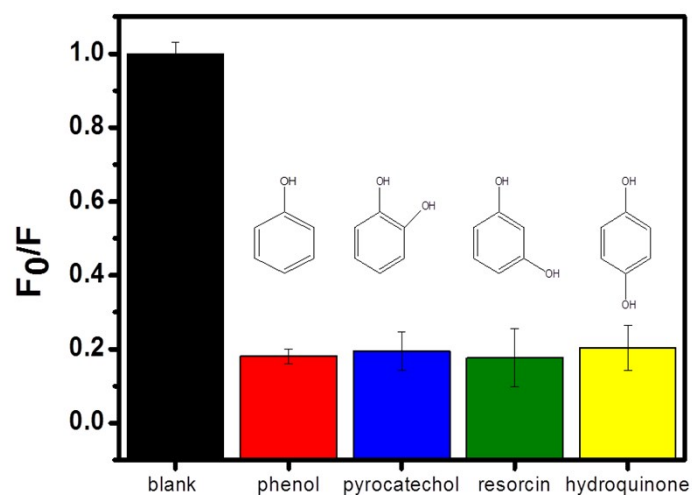

Fig. S4 fluorescence intensity ratios ( $F_0/F$ ) of CQDs with phenol analogues

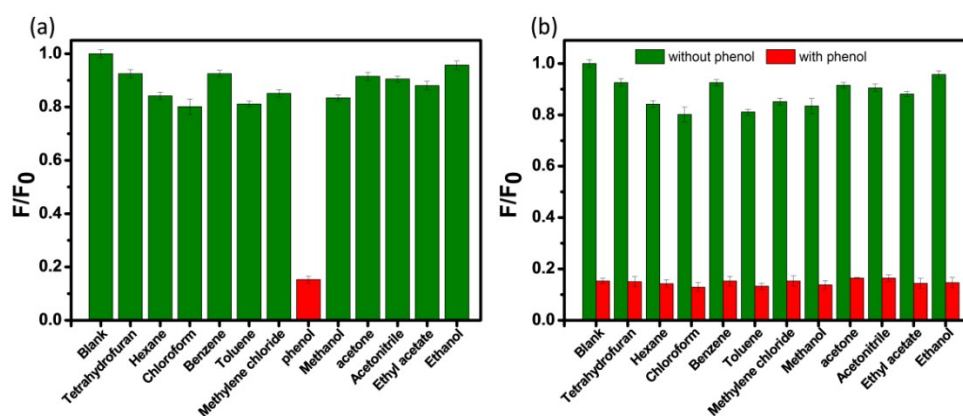

Fig. S5 (a) Fluorescence intensity ratios ( $F/F_0$ ) of the CQDs in the presence and absence of different organic solvents; (b) Selectivity of CQDs toward phenol: Column diagrams of  $F/F_0$  of CQDs-organic solvents at 530 nm. Green bars represent the addition of various organic solvents to the blank solution and red bars represent the subsequent addition of phenol to the solutions (CQDs-organic solvents-phenol) excitation wavelength at 470 nm.

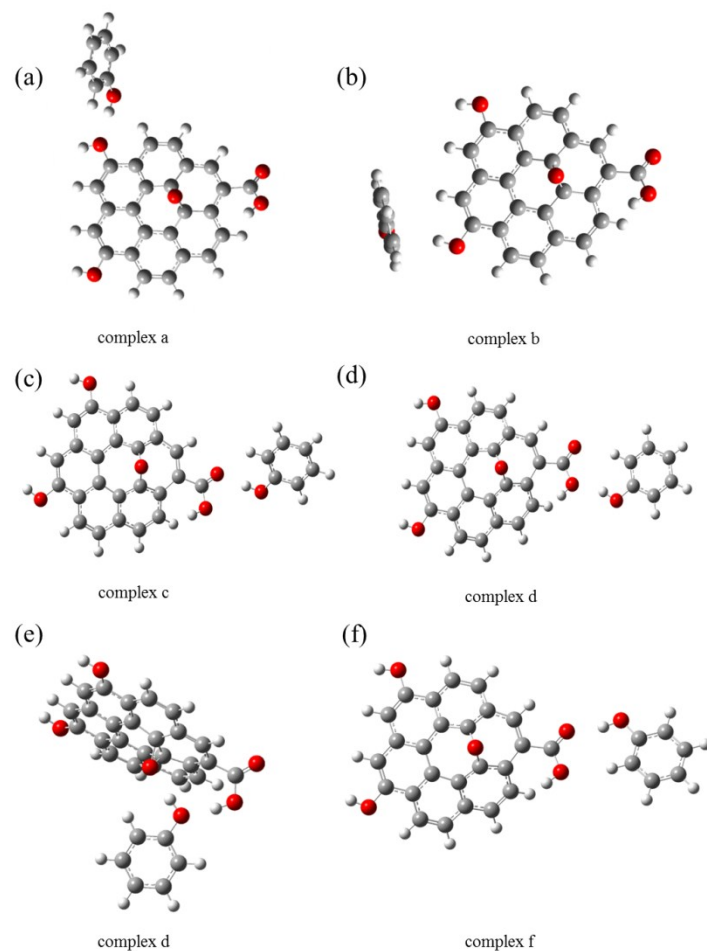

Fig. S6 Geometric optimization structure of different complexes (a-f) formed between CQDs and phenol

Table S1 The fluorescence quantum yield of CQDs

|                 | $I$        | $A$    | $\eta$ | $\Phi / \%$ |
|-----------------|------------|--------|--------|-------------|
| Quinine sulfate | 760863.603 | 0.0673 | 1.41   | 54.0        |
| CQDs            | 175891.121 | 0.0598 | 1.33   | 12.5        |

Table S2 Comparison of different methods for phenol detection

| Methods               | Detection limit ( $\mu$ M) | Ref       |
|-----------------------|----------------------------|-----------|
| UV-vis                | 0.6                        | 1         |
| Electrochemistry      | 0.07                       | 2         |
| HPLC                  | 0.03                       | 3         |
| CdTe QDs              | 0.5                        | 4         |
| Graphene quantum dots | 1.27                       | 5         |
| Carbon quantum dots   | 0.076                      | This work |

Table S3 The energies of six complexes and its relative values

|           | Energy<br>(a.u.) | Relative values<br>(a.u.) | Relative values<br>(Kcal/mol) |
|-----------|------------------|---------------------------|-------------------------------|
| complex a | -1643.49239      | 0.0001                    | 0.1                           |
| complex b | -1643.48979      | 0.003                     | 1.8                           |
| complex c | -1643.472988     | 0.019                     | 12                            |
| complex d | -1643.48522      | 0.007                     | 4.4                           |
| complex e | -1643.475889     | 0.016                     | 10                            |
| complex f | -1643.49256      | 0                         | 0                             |

Table S4 the electronic excitation energies of CQDs and **complex**

| Excited states  | CQDs (eV) | <b>complex</b> (eV) |
|-----------------|-----------|---------------------|
| S <sub>1</sub>  | 2.5184    | 2.4249              |
| S <sub>2</sub>  | 2.7745    | 2.9170              |
| S <sub>3</sub>  | 3.2667    | 2.9473              |
| S <sub>4</sub>  | 3.4593    | 3.2060              |
| S <sub>5</sub>  | 3.5969    | 3.3138              |
| S <sub>6</sub>  | 3.8016    | 3.4031              |
| S <sub>7</sub>  | 3.9017    | 3.4724              |
| S <sub>8</sub>  | 4.0014    | 3.5764              |
| S <sub>9</sub>  | 4.1175    | 3.7679              |
| S <sub>10</sub> | 4.1940    | 3.9073              |

Table S5 The bond length and <sup>1</sup>H NMR chemical shifts for hydrogen bond in S<sub>0</sub> and S<sub>1</sub> state.

|                               | S <sub>0</sub> | S <sub>1</sub> |
|-------------------------------|----------------|----------------|
| <b>Bond lengths/ Å</b>        |                |                |
| C38=O41···H55-O54             | 1.89           | 1.57           |
| <b><sup>1</sup>H NMR/ ppm</b> |                |                |
| H55                           | 23.14          | 17.87          |

### References:

1. Y. Ni, Z. Xia and S. Kokot, A kinetic spectrophotometric method for simultaneous determination of phenol and its three derivatives with the aid of artificial neural network, *J Hazard Mater*, 2011, **192**, 722-729.
2. B. C. Janegitz, R. A. Medeiros, R. C. Rocha-Filho and O. Fatibello-Filho, Direct electrochemistry of tyrosinase and biosensing for phenol based on gold nanoparticles electrodeposited on a boron-doped diamond electrode, *Diam Relat Mater*, 2012, **25**, 128-133.
3. M. O. A. S. Ramiz S. J. Alkasir, Colorimetric paper bioassay for the detection of phenolic compounds, *Anal Chem*, 2012, **84**, 9729-9737.
4. J. Yuan, W. Guo and E. Wang, Utilizing a CdTe quantum dots–enzyme hybrid system for the determination of both phenolic compounds and hydrogen peroxide, *Anal Chem*, 2008, **80**, 1141-1145.

5. S. Benítez-Martínez and M. Valcárcel, Graphene quantum dots as sensor for phenols in olive oil, *Sensors and Actuators B: Chemical*, 2014, **197**, 350-357.
